# Supplementary material for: Ferromagnetic interlayer interaction in KCo2Se2−xSx (0 ≤ x ≤ 2) and its chemical origin
Source: Royal Society of Chemistry journal article supplement (doi:10.1039/c6dt00731g), 2016-01-01
Supplement: c6dt00731g1.pdf [file c6dt00731g1.pdf]

## Supplementary Information

### Ferromagnetic interlayer interaction in $\text{KCo}_2\text{Se}_{2-x}\text{S}_x$ ( $0 \leq x \leq 2$ ) and its chemical origin

Zhongnan Guo<sup>a</sup>, Huanhuan Zhang<sup>a</sup>, Da Wang<sup>a</sup>, Bingling Han<sup>a</sup>, Shifeng Jin<sup>b</sup>, Wenxia

Yuan<sup>\*a</sup>

<sup>a</sup> Department of Chemistry, School of Chemistry and Biological Engineering, University of Science and Technology Beijing, Beijing 100083, China.

E-mail: wxyuanwz@163.com; Fax: +86-010-62333033; Tel: +86-010-62332221

<sup>b</sup> Research & Development Center for Functional Crystals, Beijing National Laboratory for Condensed Matter Physics, Institute of Physics, Chinese Academy of Sciences, Beijing 100190, China.

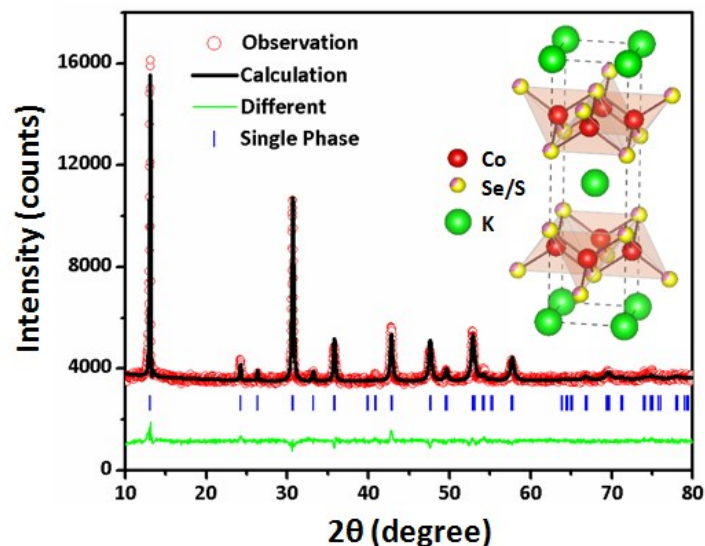

**Fig. S1** The Rietveld refinement fits, difference profiles and positions of Bragg peaks of  $\text{KCo}_2\text{Se}_{1.4}\text{S}_{0.6}$ . The inset shows the crystal structure of  $\text{KCo}_2\text{Se}_{1.4}\text{S}_{0.6}$  with the same atom coordinate of Se and S.

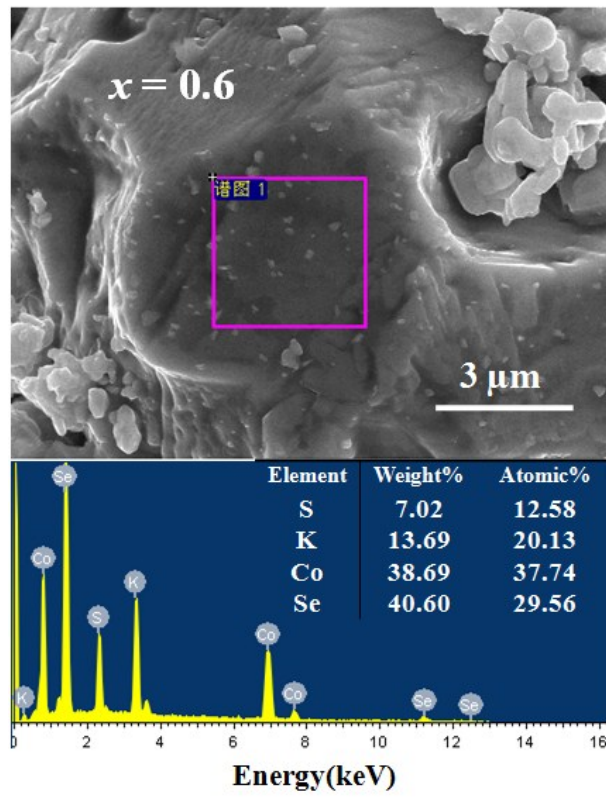

**Fig. S2** The sample morphology and EDX result of  $\text{KCo}_2\text{Se}_{1.4}\text{S}_{0.6}$ .

**Table S1.** Summary of the EDX results and the Rietveld refinement parameters of  $\text{KCo}_2\text{Se}_{2-x}\text{S}_x$ .

| Nominal $x$            | 0             | 0.2           | 0.6           | 1             | 1.4           | 2             |
|------------------------|---------------|---------------|---------------|---------------|---------------|---------------|
| $x$ from EDX           | 0             | 0.196         | 0.597         | 1.011         | 1.560         | 2             |
| Space Group            | <i>I4/mmm</i> |               |               |               |               |               |
| $a(\text{\AA})$        | 3.8672(7)     | 3.8510(4)     | 3.8292(6)     | 3.7931(10)    | 3.7583(8)     | 3.7295(4)     |
| $c(\text{\AA})$        | 13.695(14)    | 13.6270(7)    | 13.5119(11)   | 13.407(2)     | 13.2523 (16)  | 13.063(2)     |
| $V(\text{\AA}^3)$      | 204.812       | 202.091       | 198.122       | 192.895       | 187.186       | 181.696       |
| K                      | 0,0,0         |               |               |               |               |               |
| Co                     | 0,0.5,0.25    |               |               |               |               |               |
| Se/S                   | 0,0,0.3396(2) | 0,0,0.3493(1) | 0,0,0.3461(1) | 0,0,0.3370(3) | 0,0,0.3348(3) | 0,0,0.3399(3) |
| Co-Se/S-Co( $^\circ$ ) | 73.53(8)      | 70.76(6)      | 71.52(7)      | 73.95(10)     | 74.73(9)      | 73.77(8)      |
| $R_{wp}$               | 6.45%         | 5.18%         | 5.27%         | 7.32%         | 5.58%         | 4.12%         |
| $\chi^2$               | 4.85          | 1.88          | 2.29          | 2.32          | 3.16          | 1.84          |

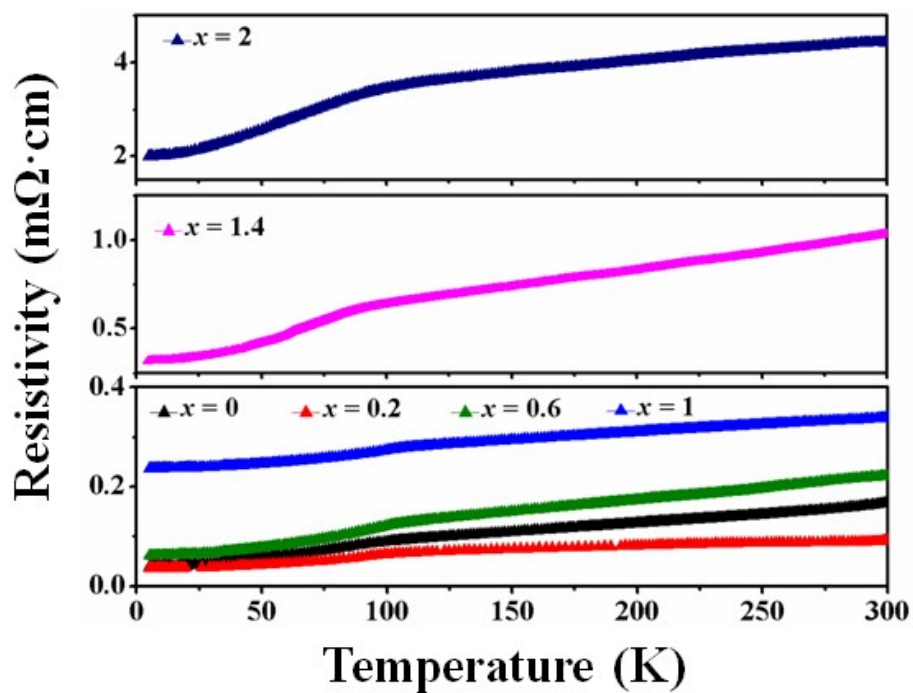

Fig. S3 Temperature dependent resistivity of  $\text{KCo}_2\text{Se}_{2-x}\text{S}_x$ .

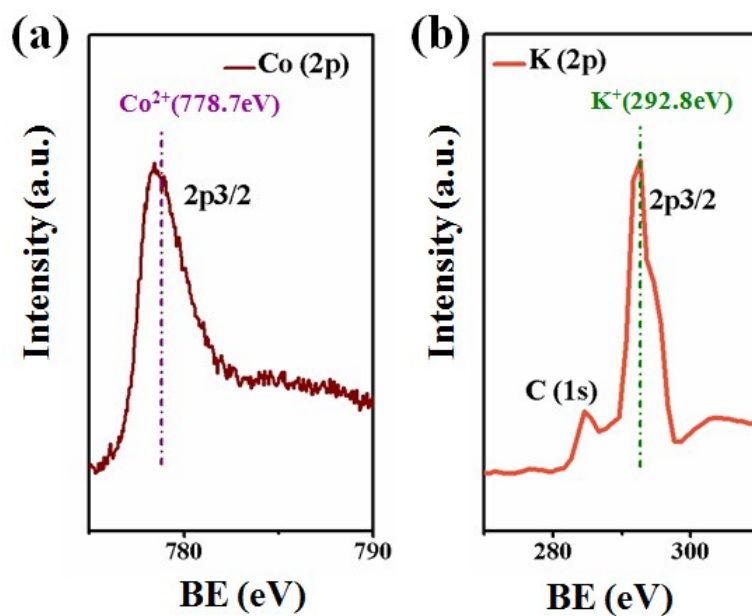

Fig. S4 (a) XPS Co 2p and (b) K 2p of sample  $\text{KCo}_2\text{Se}_{1.4}\text{S}_{0.6}$ . The two dashed lines correspond to the binding energies of Co +2 valence<sup>1</sup> and K +1 valence.<sup>2</sup> BE denotes the binding energy.

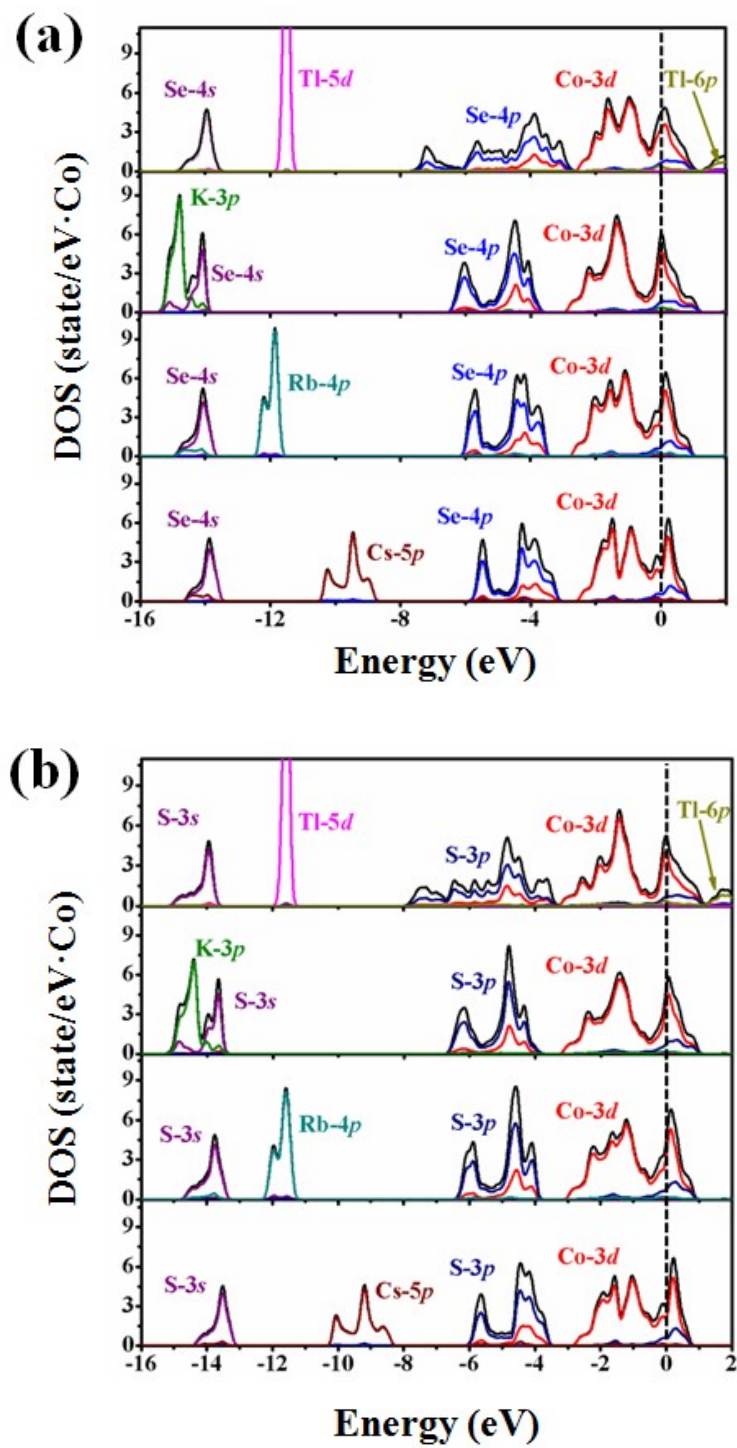

**Fig. S5** Total and partial DOS of eight layered cobalt chalcogenides:

(a) four selenides and (b) four sulfides.

**Table S2.** Structure parameters used for the RKKY model and the obtained results:

| Composition                                            | Type | $a$<br>(Å)          | $c$<br>(Å)          | $N(E_F)$<br>(eV <sup>-1</sup> ) | $k_F$  | $x$     | $\Gamma$<br>$\times 10^5$ |
|--------------------------------------------------------|------|---------------------|---------------------|---------------------------------|--------|---------|---------------------------|
| KCo <sub>2</sub> Se <sub>1.4</sub> S <sub>0.6</sub>    | F    | 3.8292              | 13.5119             | 4.98                            | 2.2836 | 30.8552 | 2.9416                    |
| TlCo <sub>2</sub> Se <sub>1.75</sub> S <sub>0.25</sub> | AF   | 3.8402 <sup>3</sup> | 13.494 <sup>3</sup> | 4.51                            | 2.2061 | 29.7689 | -0.1615                   |
| TlCo <sub>2</sub> Se <sub>2</sub>                      | AF   | 3.8471 <sup>3</sup> | 13.542 <sup>3</sup> | 4.41                            | 2.1852 | 29.5938 | -0.8335                   |
| KCo <sub>2</sub> Se <sub>2</sub>                       | F    | 3.8672              | 13.695              | 5.92                            | 2.3911 | 32.5805 | 1.0611                    |
| RbCo <sub>2</sub> Se <sub>2</sub>                      | F    | 3.825 <sup>4</sup>  | 14.49 <sup>4</sup>  | 3.98                            | 2.072  | 30.0120 | 0.7641                    |
| CsCo <sub>2</sub> Se <sub>2</sub>                      | AF   | 3.824 <sup>4</sup>  | 15.314 <sup>4</sup> | 2.99                            | 1.8506 | 28.3408 | -4.3731                   |
| TlCo <sub>2</sub> S <sub>2</sub>                       | F    | 3.741 <sup>3</sup>  | 12.956 <sup>3</sup> | 5.23                            | 2.3907 | 30.9744 | 3.0888                    |
| KCo <sub>2</sub> S <sub>2</sub>                        | F    | 3.7295              | 13.063              | 5.13                            | 2.3754 | 30.7728 | 2.8129                    |
| RbCo <sub>2</sub> S <sub>2</sub>                       | F    | 3.725 <sup>4</sup>  | 13.74 <sup>4</sup>  | 4.36                            | 2.2132 | 30.4088 | 1.9989                    |
| CsCo <sub>2</sub> S <sub>2</sub>                       | F    | 3.736 <sup>4</sup>  | 14.5 <sup>4</sup>   | 2.81                            | 1.8736 | 28.0116 | -4.4358                   |

where  $\Gamma = \frac{x \cos x - \sin x}{x^4}$  and  $x = 2k_F d$ , and for a tetragonal unit cell the  $k_F$

could be obtained from <sup>5</sup>:

$$k_F = 2(6Z\pi^2 / V)^{\frac{1}{3}}$$

$Z$  is the number of the conduction electrons per Co, and for our calculation we use the DOS per Co at the Fermi level  $N(E_F)$  as  $Z$ .<sup>6</sup>

## References

1. A. B. Mandale, S. Badrinarayanan, S. K. Date and A. P. B. Sinha, *J. Electron Spectrosc. Relat. Phenom.*, 1984, **33**, 61-72.
2. W. E. Morgan, J. R. Van Wazer and W. J. Stec, *J. Am. Chem. Soc.*, 1973, **95**, 751-755.
3. M. Greaney, G. Huan, K. V. Ramanujachary, Z. Teweldmedhin and M. Greenblatt, *Solid State Commun.*, 1991, **79**, 803-810.
4. G. Huan, M. Greenblatt and M. Croft, *Eur. J. Solid State Inorg. Chem.*, 1989, **26**, 193-220.
5. J. Leciejewicz and A. Szytula, *J. Magn. Magn. Mater.*, 1987, **63-64**, 190-192.
6. An integration of the partial DOS of Co  $3d$  states near the Fermi level was firstly used as the  $Z$  in RKKY model, but the results could not reflect the different

ordering types since the integration of different compounds are basically the same.  
So we turn to use the  $N(E_F)$  directly as  $Z$ .
